# Supplementary material
Source: ML conference proceedings conference paper supplement (https://proceedings.mlr.press/v164/yuan22a.html)
Supplement: Supplementary file 2 [file yuan22a-supp.zip]

Archive with 2 entries (2 files):
- CoRL2021_SORNet_supplement.pdf
- __MACOSX/._CoRL2021_SORNet_supplement.pdf
